# Supplementary material for: Amino acid-inspired electrochemical recognition of phenylalanine enantiomers using amphoteric chitosan
Source: Royal Society of Chemistry journal article supplement (doi:10.1039/c8nj00391b), 2018-01-01
Supplement: c8nj00391b1.pdf [file c8nj00391b1.pdf]

## Supporting Information

### Amino acid-Inspired Electrochemical Recognition of Phenylalanine

#### Enantiomers by Amphoteric Chitosan

Zhenliang Li, Zunli Mo<sup>\*</sup>, Pengji Yan, Shujuan Meng, Ruijuan Wang, Xiaohui Niu, Nijun Liu and  
Ruibin Guo<sup>\*</sup>

<sup>a</sup>*Key Laboratory of Eco-Environment-Related Polymer Materials, Ministry of Education of China,  
Key Laboratory of Polymer Materials of Gansu Province, College of Chemistry and Chemical  
Engineering, Northwest Normal University, Lanzhou 730070, PR China.*

<sup>b</sup>*College of Chemistry and Chemical Engineering, Hexi University, Zhangye 734000*

*E-mail: mozlnwnu2010@163.com (Zunli Mo), nwnugrb@163.com (Ruibin Guo)*

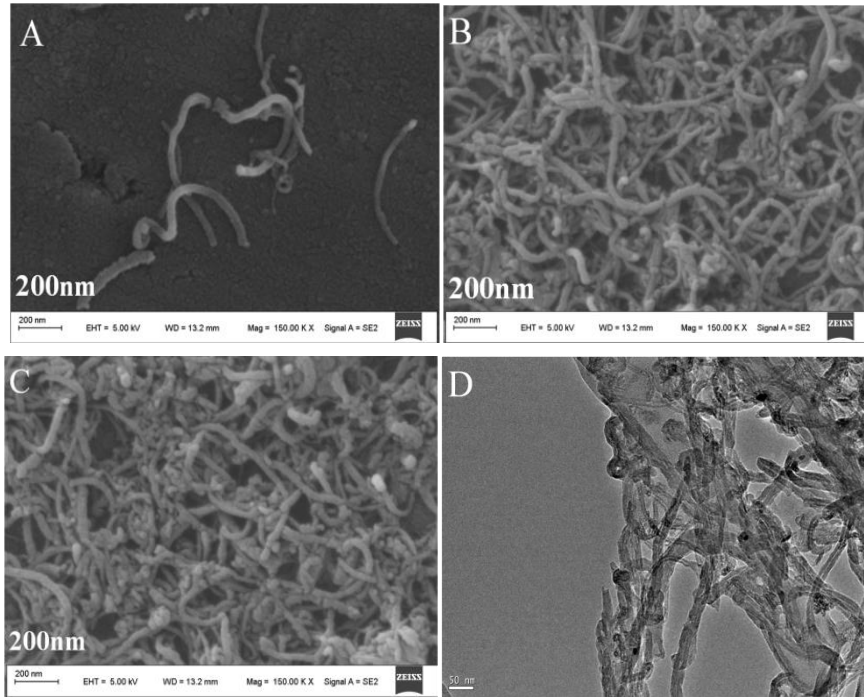

Fig. 1S The SEM and TEM image of (A) MWCNTs, (B) MWCNTs-EA and (C) MWCNTs-EA-ACCS (D) MWCNTs-EA-ACCS.

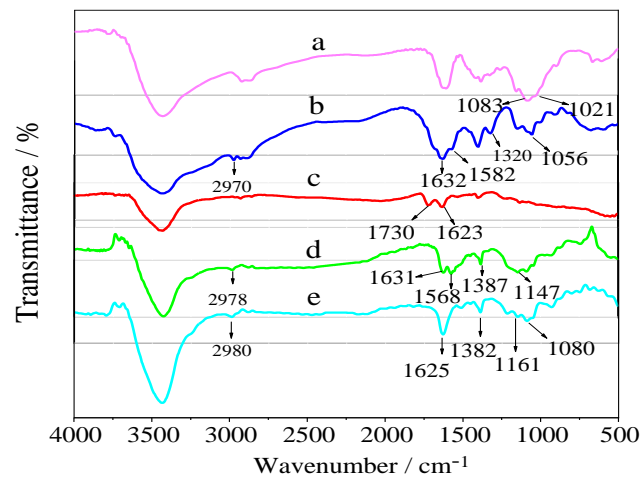

Fig. 2S FT-IR spectra of (a) CS (b) ACCS (c) MWCNTs-COOH (d) MWCNTs-EA and (e) MWCNTs-EA-ACCS.

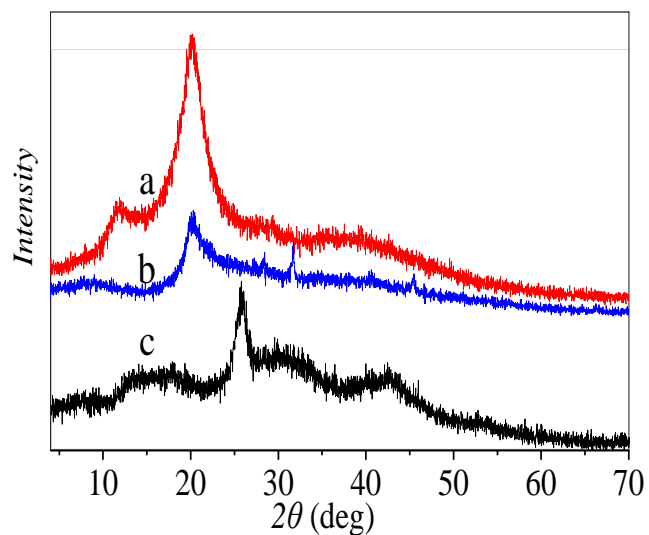

Fig. 3S XRD spectrums of (a) CS, (b) ACCS and (c) MWCNTs-EA-ACCs.

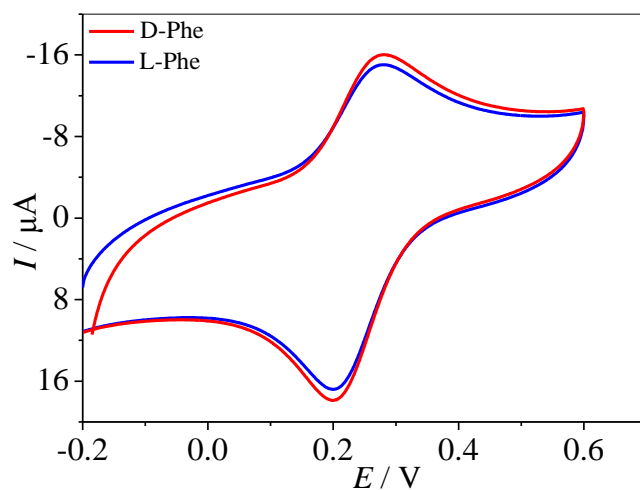

Fig.4S CV of 10 mM Phe enantiomers at MWCNTs/GCE in 0.2 M PBS buffer solution (pH=6.0) containing 5.0 mM  $[\text{Fe}(\text{CN})_6]^{3-/4-}$ .

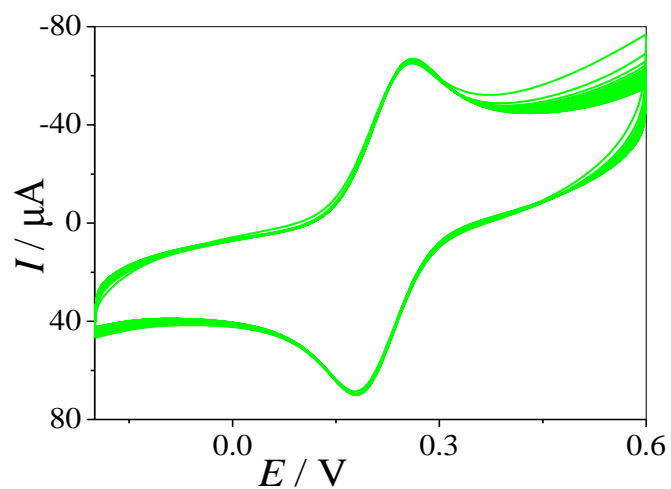

Fig.5S The stability of MWCNTs-EA-ACCs/GCE

Table 1S The reproducibility of the MWCNTs-EA-ACCS/GCE

| MWCNTs-EA-ACCS/GCE              | 1    | 2    | 3    | 4    | 5    |
|---------------------------------|------|------|------|------|------|
| $\Delta I(I_{D-Phe}-I_{L-Phe})$ | 0.67 | 0.71 | 0.75 | 0.73 | 0.66 |
| RSD                             | 3.8% |      |      |      |      |
